# Supplementary material for: Hyperactivation of proprioceptors induces microglia-mediated long-lasting pain in a rat model of chronic fatigue syndrome
Source: Springer Nature journal article supplement (doi:10.1186/s12974-019-1456-x), 2019-03-30
Supplement: MOESM1 [file 16586924]

## Additional files

**Table S1.** Characterization of the primary antibodies used for immunohistochemistry (IHC).

| Antibody against | Host       | Code, source                  | Dilution |
|------------------|------------|-------------------------------|----------|
| ATF3             | rabbit     | sc-188, Santa Cruz, USA       | 1:1000   |
| Iba1             | rabbit     | 019-19741, Wako, Japan        | 1:1000   |
| SV2A             | rabbit     | ab32942, Abcam, USA           | 1:400    |
| CGRP             | goat       | 1720-9007, Bio-Rad, USA       | 1:5000   |
| ChAT             | goat       | AB144P, Merck, Germany        | 1:200    |
| DINE             | goat       | sc-11338, Merck, Germany      | 1:1000   |
| TrkA             | goat       | AF1056, R&D systems, USA      | 1:500    |
| TrkB             | goat       | sc-12, Santa Cruz, USA        | 1:50     |
| TrkC             | goat       | AF1404, R&D systems, USA      | 1:100    |
| Err3             | mouse      | PP-H6812-00, R&D systems, USA | 1:100    |
| NeuN             | mouse      | MAB377, Santa Cruz, USA       | 1:100    |
| VGluT1           | guinea pig | AB5905, Merck, Germany        | 1:1000   |
| IB4              | --         | L2895, Sigma, USA             | 1:1000   |
