# Supplementary material for: Hyperactivation of proprioceptors induces microglia-mediated long-lasting pain in a rat model of chronic fatigue syndrome
Source: Springer Nature journal article supplement (doi:10.1186/s12974-019-1456-x), 2019-03-30

# Additional files

## Figure S1

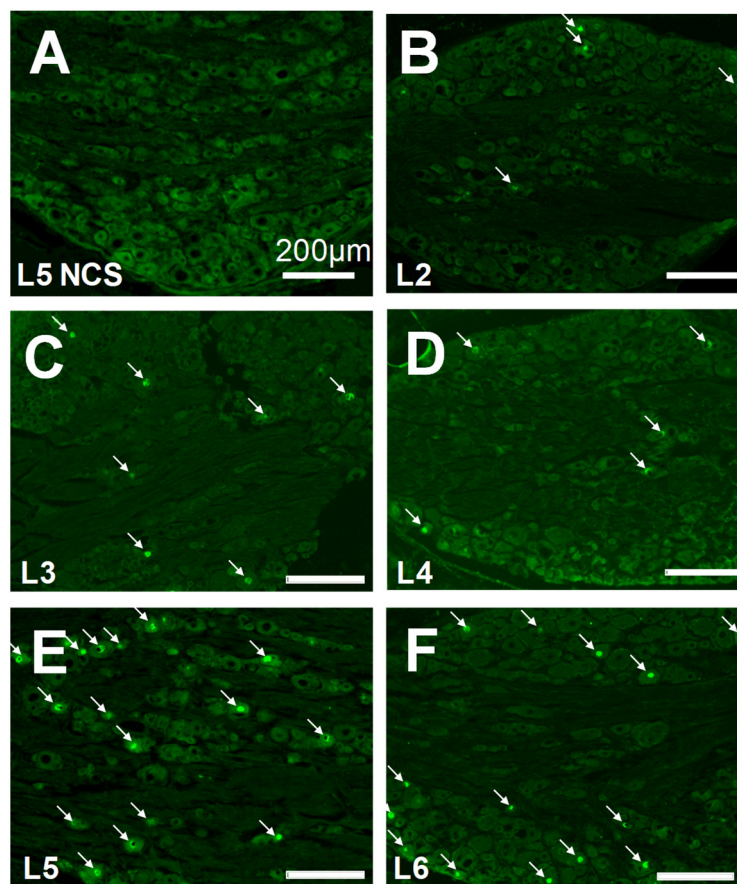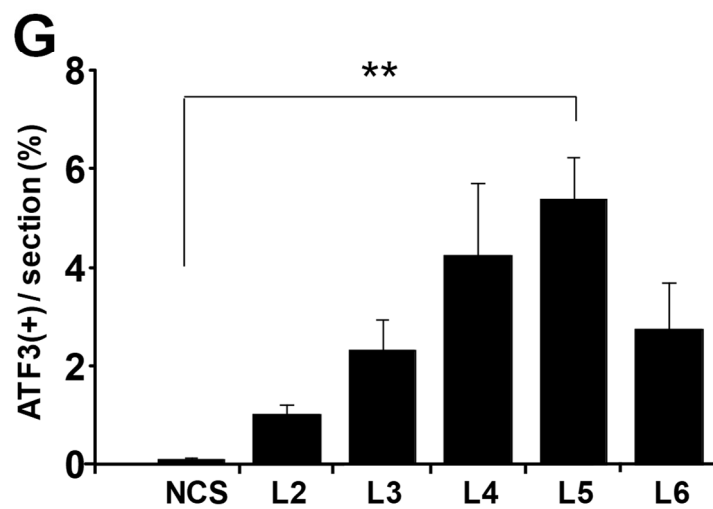

Supplement: MOESM2 [file 16586924]
