# Supplementary material for: Hyperactivation of proprioceptors induces microglia-mediated long-lasting pain in a rat model of chronic fatigue syndrome
Source: Springer Nature journal article supplement (doi:10.1186/s12974-019-1456-x), 2019-03-30

## Additional files

Figure S2.

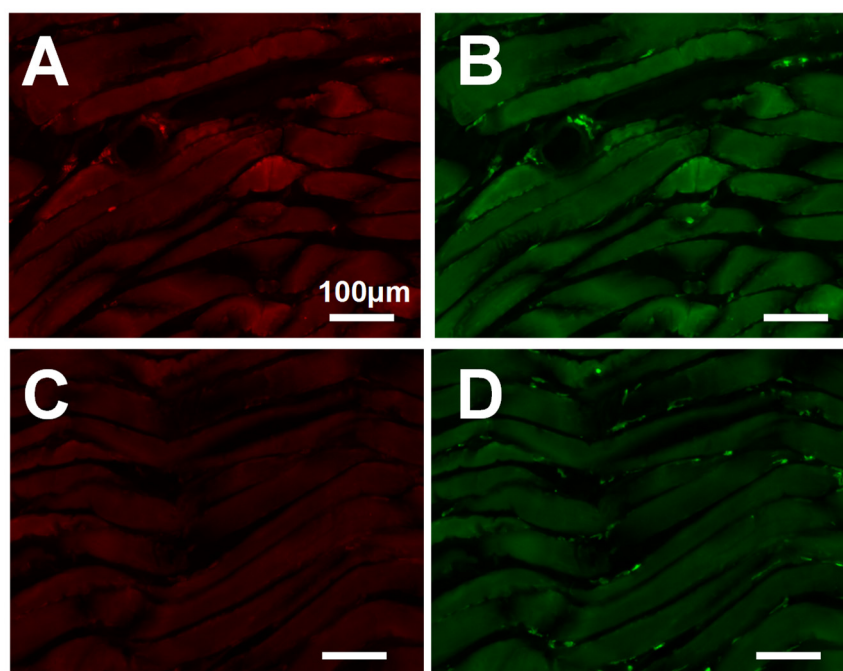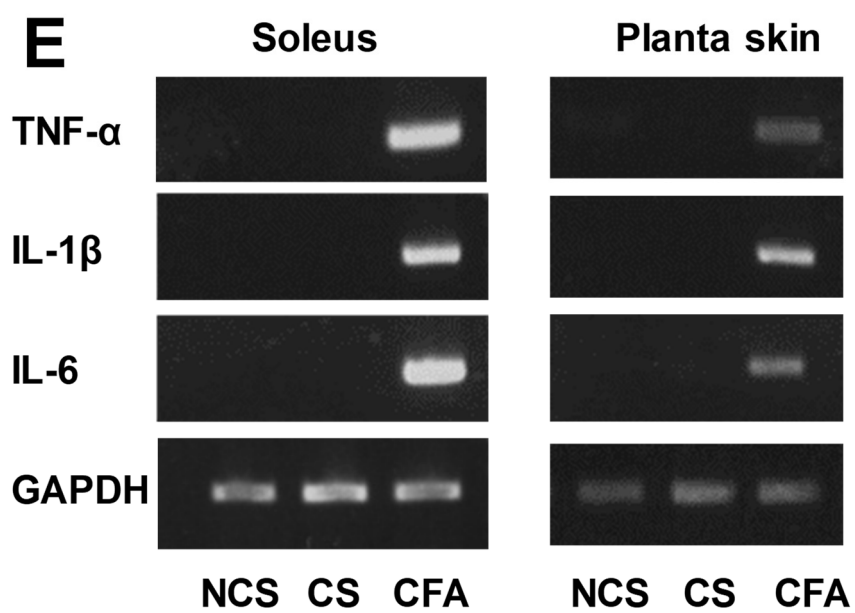

Supplement: MOESM3 [file 16586924]
